# Supplementary material
Source: HighWire-hosted journal article supplement (https://tsaco.smart01.highwire.org/content/9/1/e001165)
Supplement: inline-supplementary-material-1 [file inline-supplementary-material-1.pdf]

## Supplementary File Material 1

## ICD 9 procedure codes

|         |       |                                                             |
|---------|-------|-------------------------------------------------------------|
| 42.01 - | 42.99 | 42 Operations on esophagus                                  |
| 51.01 - | 51.99 | 51 Operations on gallbladder and biliary tract              |
| 52.01 - | 52.99 | 52 Operations on pancreas                                   |
| 53.00 - | 53.9  | 53 Repair of hernia                                         |
| 54.0 -  | 54.99 | 54 Other operations on abdominal region                     |
| 43.0 -  | 43.99 | 43 Incision and excision of stomach                         |
| 44.00 - | 44.99 | 44 Other operations on stomach                              |
| 45.00 - | 45.95 | 45 Incision, excision, and anastomosis of intestine         |
| 46.01 - | 46.99 | 46 Other operations on intestine                            |
| 47.01 - | 47.99 | 47 Operations on appendix                                   |
| 48.0 -  | 48.99 | 48 Operations on rectum, rectosigmoid and perirectal tissue |
| 49.01 - | 49.99 | 49 Operations on anus                                       |
| 50.0 -  | 50.99 | 50 Operations on liver                                      |
