# Supplementary material
Source: HighWire-hosted journal article supplement (https://tsaco.smart01.highwire.org/content/9/1/e001165)
Supplement: inline-supplementary-material-2 [file inline-supplementary-material-2.pdf]

## Supplementary File 2

| <b>Unadjusted Hazard Ratios for EGS Associated 30-days Primary Index Admission Inpatient 30-days Mortality (n=9,551)</b>                                                                                                                                                                                                                                                                                                                                                                           |                                         |                |
|----------------------------------------------------------------------------------------------------------------------------------------------------------------------------------------------------------------------------------------------------------------------------------------------------------------------------------------------------------------------------------------------------------------------------------------------------------------------------------------------------|-----------------------------------------|----------------|
| <b>Characteristics</b>                                                                                                                                                                                                                                                                                                                                                                                                                                                                             | <b>Unadjusted Hazard Ratio (95% CI)</b> | <b>P value</b> |
| <b>Financial Status</b><br>Self-Paid                                                                                                                                                                                                                                                                                                                                                                                                                                                               | 1.20 (0.84, 1.72)                       | 0.283          |
| <b>Complication Status</b>                                                                                                                                                                                                                                                                                                                                                                                                                                                                         | 8.67 (5.71, 13.16)                      | <0.001**       |
| <b>Sex</b><br>Female                                                                                                                                                                                                                                                                                                                                                                                                                                                                               | 1.19 (0.97, 1.47)                       | 0.088          |
| <b>Charlson Comorbidity Index</b>                                                                                                                                                                                                                                                                                                                                                                                                                                                                  |                                         |                |
| CCI 1 (mild)                                                                                                                                                                                                                                                                                                                                                                                                                                                                                       | 1.50 (1.03, 2.19)                       | <0.001**       |
| CCI 2 (moderate)                                                                                                                                                                                                                                                                                                                                                                                                                                                                                   | 3.34 (2.26, 4.92)                       |                |
| CCI 3 (severe)                                                                                                                                                                                                                                                                                                                                                                                                                                                                                     | 3.27 (2.24, 4.76)                       |                |
| <b>Age</b><br>70-79 years<br>>80 years                                                                                                                                                                                                                                                                                                                                                                                                                                                             | 1.30 (1.03, 1.64)<br>1.66 (1.24, 2.23)  | 0.0018*        |
| <b>Residency</b><br>Karachi                                                                                                                                                                                                                                                                                                                                                                                                                                                                        | 1.16 (0.88, 1.52)                       | 0.276          |
| <b>Admission Source</b><br>Emergency room                                                                                                                                                                                                                                                                                                                                                                                                                                                          | 3.09 (2.29, 4.18)                       | <0.001**       |
| <b>Surgical Intervention</b><br>Operated                                                                                                                                                                                                                                                                                                                                                                                                                                                           | 0.45 (0.37, 0.56)                       | <0.001**       |
| <b>Surgical Site Infections</b>                                                                                                                                                                                                                                                                                                                                                                                                                                                                    | 1.53 (1.21, 1.94)                       | <0.001**       |
| <b>Pulmonary Complications</b>                                                                                                                                                                                                                                                                                                                                                                                                                                                                     | 4.78 (3.82, 5.98)                       | <0.001**       |
| <b>Acute Renal Failure</b>                                                                                                                                                                                                                                                                                                                                                                                                                                                                         | 3.78 (3.04, 4.70)                       | <0.001**       |
| <b>Urinary Tract Infections</b>                                                                                                                                                                                                                                                                                                                                                                                                                                                                    | 1.21 (0.88, 1.67)                       | 0.252          |
| <b>Deep Vein Thrombosis/Pulmonary Embolism/Thrombophlebitis</b>                                                                                                                                                                                                                                                                                                                                                                                                                                    | 1.94 (1.09, 3.46)                       | 0.041*         |
| <b>Acute Myocardial Infarction</b>                                                                                                                                                                                                                                                                                                                                                                                                                                                                 | 2.04 (1.51, 2.75)                       | <0.001**       |
| <b>Sepsis</b>                                                                                                                                                                                                                                                                                                                                                                                                                                                                                      | 4.58 (3.45, 6.07)                       | <0.001**       |
| <b>Septic Shock</b>                                                                                                                                                                                                                                                                                                                                                                                                                                                                                | 6.81 (5.35, 8.68)                       | <0.001**       |
| <b>Cardiac Arrest</b>                                                                                                                                                                                                                                                                                                                                                                                                                                                                              | 23.21 (18.47, 29.16)                    | <0.001**       |
| <b>Pneumonia</b>                                                                                                                                                                                                                                                                                                                                                                                                                                                                                   | 2.04 (1.56, 2.68)                       | <0.001**       |
| <b>Stroke</b>                                                                                                                                                                                                                                                                                                                                                                                                                                                                                      | 1.25 (0.51, 3.02)                       | 0.635          |
| <b>Coma</b>                                                                                                                                                                                                                                                                                                                                                                                                                                                                                        | 0.95 (0.35, 2.55)                       | 0.918          |
| <b>Haemorrhage</b>                                                                                                                                                                                                                                                                                                                                                                                                                                                                                 | 1.49 (0.98, 2.26)                       | 0.072          |
| <b>GI Bleeding</b>                                                                                                                                                                                                                                                                                                                                                                                                                                                                                 | 1.66 (1.07, 2.59)                       | 0.035*         |
| Survival Regression using Weibull Distribution applied<br>*p-value <0.05 **p-value <0.001<br>Reference Categories from Top to Bottom: Insurance Status= Privately insured; Complication status= no complication;<br>Sex= Male; CCI Score= 0 (none); Age categories= 60-69 years; Residency= Outside Karachi; Admission source=<br>Consulting clinics; Surgical intervention= non-operated; For each of the complications, the reference category was the<br>absence of the respective complication |                                         |                |
